# Supplementary material
Source: PubMed Central journal article supplement (PMC3052917)
Supplement: epi0601_0086SD1.pdf [file epi0601_0086SD1.pdf]

Fryer et al Supplemental Figure S1

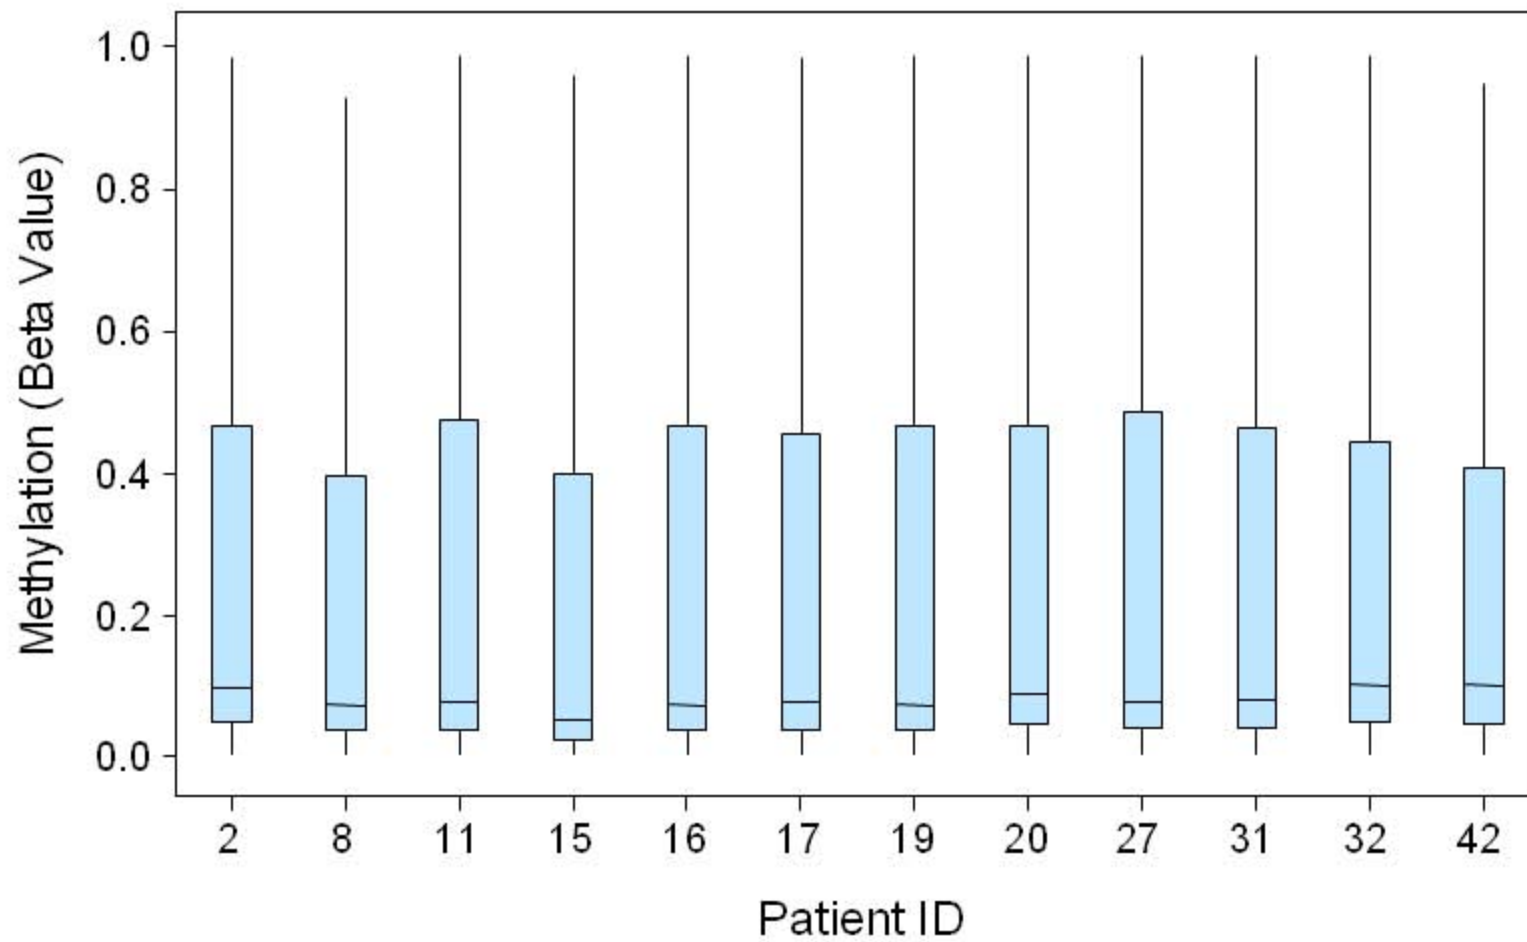

Fryer et al Supplemental Figure S2

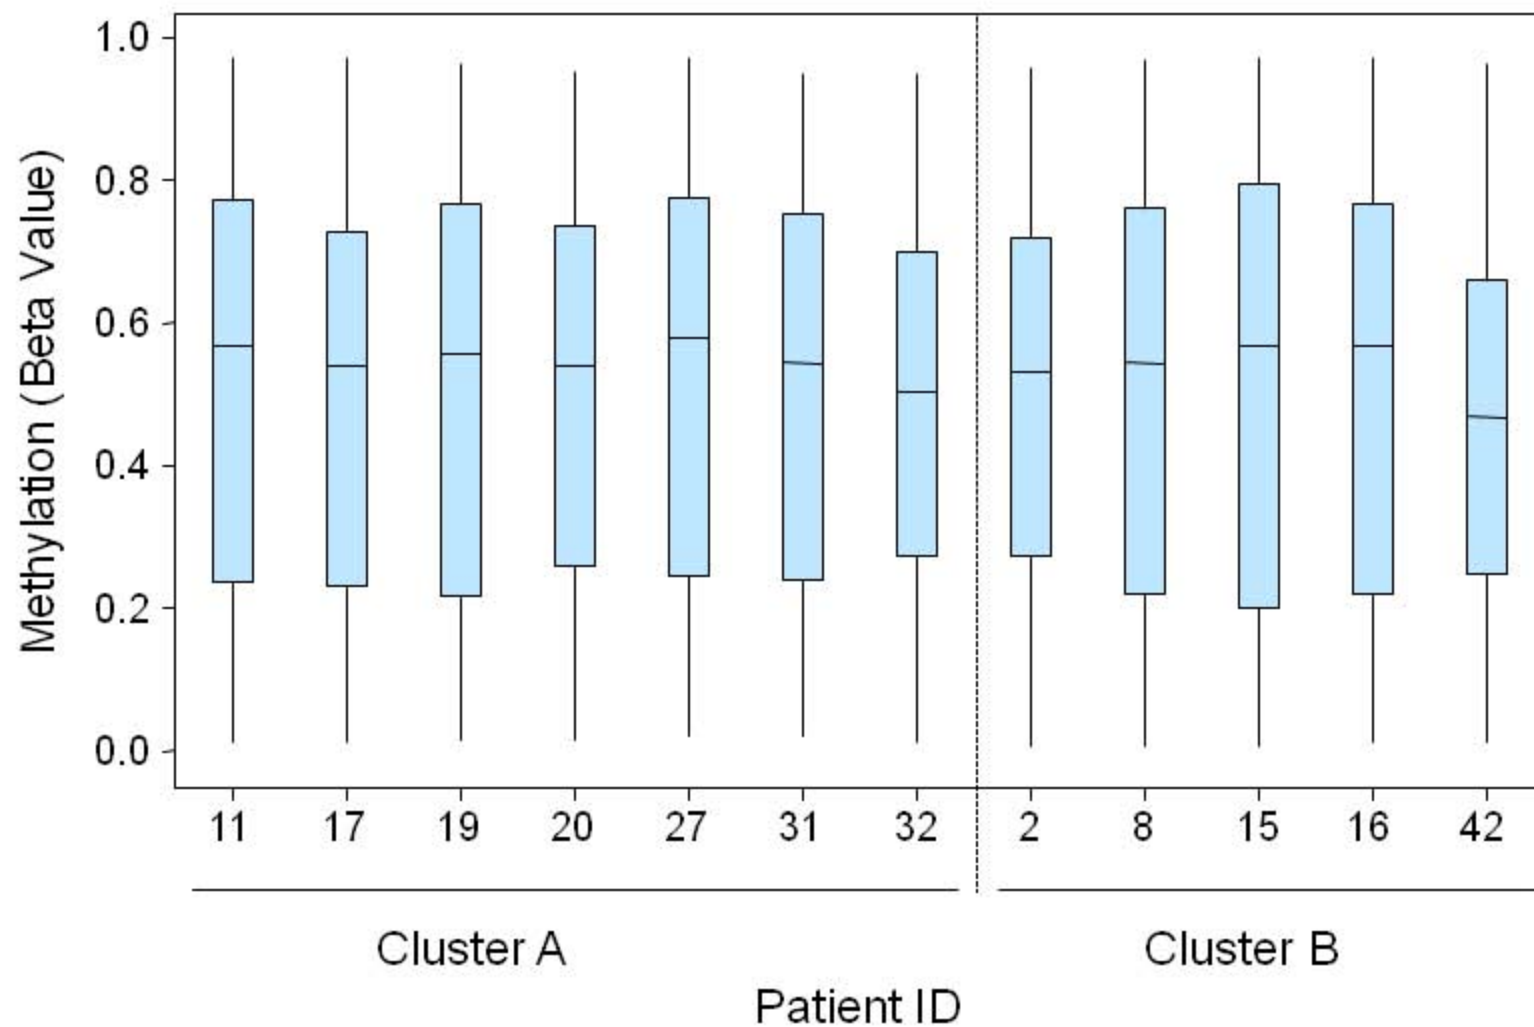

Fryer et al Supplemental Figure S3

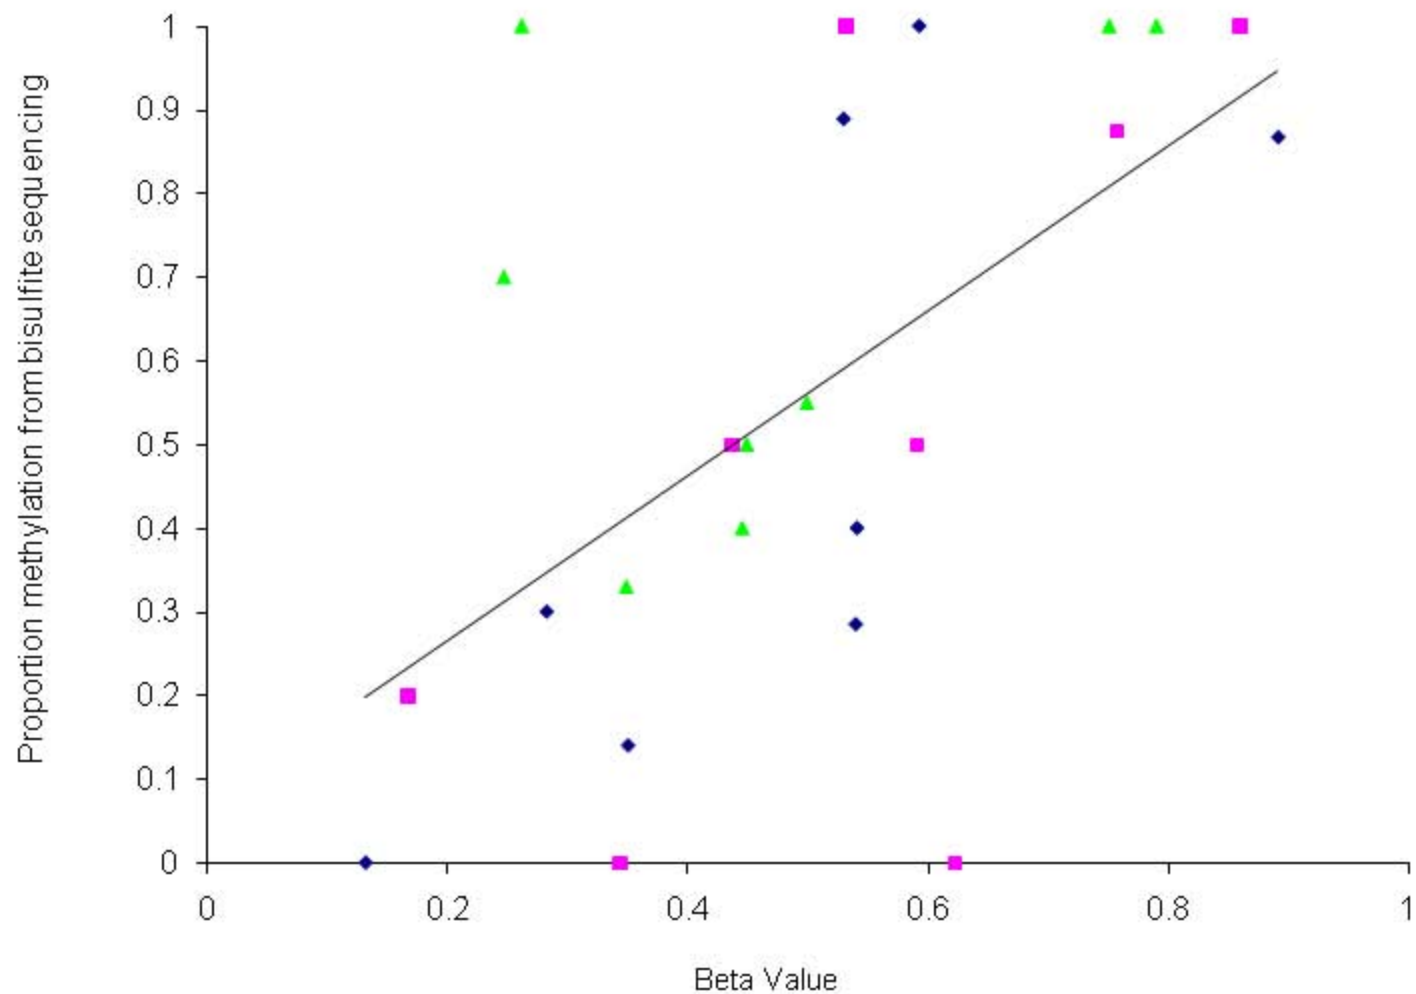

### **Supplemental Figure S1**

Box-whisker plot of methylation values for 21,261 CpGs (detection P value > 0.05 and null values removed) for twelve patient samples. Box represents inter-quartile range (IQR), Horizontal line = median, whiskers extend to 1.5 x IQR.

### **Supplemental Figure S2**

Box-whisker plot of methylation values for clustered 6,5321 CpGs (detection P value > 0.05, null values and invariant sites removed). Patient samples are grouped by cluster. Box represents inter-quartile range (IQR), Horizontal line = median, whiskers extend to 1.5 x IQR.

### **Supplemental Figure S3**

Bead Array validation. Seven CpG sites with a range of beta values were selected for validation by bisulphite sequencing in three patient samples (11: ◆, 19: ■ and 42: ▲) with an average of 7.5 clones per site per sample. This showed a strong overall positive correlation (as illustrated by trend line) between beta value and proportion of methylated sites from bisulphite sequencing ( $r = 0.58$ ,  $p=0.003$ ).

### **Supplemental Table 1**

Relationship between folic acid supplementation and maternal and fetal characteristics

### **Supplemental Table 2**

Genes where methylation is significantly associated with birth weight centile, plasma homocysteine and LINE-1 methylation. Column headings are Symbol; HUGO gene symbol, Chr; chromosome location of CpG measured, MapInfo; base-pair position of C of target CpG, TargetID; unique illumina reference for target CpG, Pt x; Patient identifier numbers, Correlation with LINE-1; correlation coefficient between beta value and LINE-1 methylation, Correlation with Homocysteine; correlation coefficient between beta value and plasma homocysteine, Correlation with Folate; correlation coefficient between beta value and folate, Correlation with Birth weight centile; correlation coefficient between beta value and birth weight centile, significant correlation with LINE-1; significant correlation found between beta value and LINE-1 methylation (yes/no), significant correlation with Homocysteine; significant correlation found between beta value and

plasma homocysteine (yes/no), significant correlation with Folate; significant correlation found between beta value and Folate (yes/no), significant correlation with Birth Weight centile; significant correlation found between beta value and birth weight centile (yes/no).

### **Supplemental Table 3**

Identification of functional terms enriched within genes where methylation is significantly associated with birth weight centile, plasma homocysteine and LINE-1 methylation. All enriched categories were determined using the Database for Annotation, Visualization and Integrated Discovery (DAVID) software package. EASE scores < 0.05 were considered significant. Column headings are Category; database queried, Term; definition of term within category, Count, number of genes found in a term, Pvalue (EASE); probability of enrichment as determined by the EASE statistic a modified Fishers exact test, Genes; names of genes found in term, Fold Enrichment; fold enrichment of genes identified in term compared to genome wide membership of that term.

**Supplementary Table 1**

| Folic acid supplementation            | No               | Yes              | <i>P</i> * |
|---------------------------------------|------------------|------------------|------------|
| N                                     | 4                | 8                |            |
| Maternal age (years)                  | 27 (23-31)       | 33 (22-37)       | 0.497      |
| Maternal BMI                          | 31 (22-32)       | 28 (23-34)       | 0.819      |
| Parity                                | 0 (0-2)          | 1 (0-1.5)        | 0.662      |
| Fetal serum folate                    | 12.6 (10.8-20.0) | 16.0 (14.4-20.0) | 0.195      |
| Fetal plasma homocysteine (μmol/L)    | 10.9 (8.2-14.2)  | 11.0 (7.4-13.6)  | 0.850      |
| Maternal serum folate                 | 4.7 (4.1-6.1)    | 7.2 (6.7-13.2)   | 0.083      |
| Maternal plasma homocysteine (μmol/L) | 9.2 (7.5-10.9)   | 11.4 (9.7-14.2)  | 0.149      |

\* P value calculated using Mann-Whitney U test
